# Supplementary material for: Conflict-of-interest disclosure at medical journals in Japan: a nationwide survey of the practices of journal secretariats
Source: HighWire-hosted journal article supplement (doi:10.1136/bmjopen-2015-007957), 2015-08-01
Supplement: bmjopen-2015-007957supp.pdf [file bmjopen-2015-007957supp.pdf]

---

## Appendix

---

Question 9 Please list any problems or unclear points concerning COI management regarding submitted manuscripts.

Selected responses:

- We have not yet had even one case of COI disclosure, so we worry that there might be something really inadequate about the present system.
  - What should be done concerning paper acceptance and publication if commercial sponsoring appears involved?
  - Although COI disclosure is made for the entire manuscript on submission, its clarification requires confirmation.
  - It appears that some journals destroy disclosure documentation (whether paper or electronic) after 1-2 years, but in fact is there not a problem in destroying documentation, even concerning accepted manuscripts?
  - The method of investigating the background of COI disclosure contents is unclear.
  - Are investigations and sanction systems common in foreign journals?
  - We do not fully comprehend the extent to which COI management should be implemented. We would appreciate concrete instructions from JAMS.
  - Including the university with which the head of our editorial committee is affiliated, many universities and research institutes have ethics committees, etc. that have been properly regulating the behavior of investigators internally for the past 2-3 years. With those organizations in place, regarding submissions and also editorial board members, our journal now does not have any specific policy [in those matters], and entrusts them to the submitting author.
  - How COI disclosure conditions are decided on is unclear.
-
